# Supplementary material for: Transferrin receptor 1 plays an important role in muscle development and denervation-induced muscular atrophy
Source: PubMed Central journal article supplement — Neural Regen Res. 2020 Dec 12;16(7):1308–16. doi: 10.4103/1673-5374.301024 (PMC8284266; doi:10.4103/1673-5374.301024), 2020-12-12
Supplement: NRR-16-1308_Suppl1.pdf [file NRR-16-1308_Suppl1.pdf]

WB-TfR1

|       | mean     | SD       | SEM      |
|-------|----------|----------|----------|
| WT    | 24567.61 | 23650.21 | 20651.31 |
| KO    | 21879.67 | 3489.56  | 2967.224 |
| KO/WT | 0.167841 | 0.168596 | 0.143682 |

qPCR

|                      | Control  |          |          |          |          |          | Denervation |          |          |          |          |          | MEAN     |
|----------------------|----------|----------|----------|----------|----------|----------|-------------|----------|----------|----------|----------|----------|----------|
|                      | C1       | C2       | C3       | C4       | C5       | C6       | D1          | D2       | D3       | D4       | D5       | D6       |          |
| Actin                | 19.73    | 19.365   | 18.17    | 18.73    | 18.49    | 18.99    | 19.065      | 19.175   | 18.625   | 19.605   | 17.755   | 19.4     |          |
| TfR1                 | 25.465   | 24.065   | 23.615   | 24.605   | 24       | 23.775   | 24.869      | 26.851   | 25.338   | 25.231   | 26.332   | 25.048   |          |
| $\Delta Ct$          | 5.735    | 4.7      | 5.445    | 5.875    | 5.51     | 4.785    | 5.341667    | 5.804    | 7.676    | 6.713    | 5.626    | 8.577    | 5.648    |
| $\Delta\Delta Ct$    | 0.393333 | -0.64167 | 0.103333 | 0.533333 | 0.168333 | -0.55667 |             | 0.462333 | 2.334333 | 1.371333 | 0.284333 | 3.235333 | 0.306333 |
| 2- $\Delta\Delta Ct$ | 0.761368 | 1.56013  | 0.93088  | 0.690956 | 0.88987  | 1.470867 | 1           | 0.725811 | 0.198288 | 0.386534 | 0.821121 | 0.106186 | 0.808694 |
| SD                   | 0.338972 | 0.056495 |          |          |          |          |             | 0.290985 | 0.048497 |          |          |          |          |
| Mean                 | 1.050679 |          |          |          |          |          |             | 0.507772 |          |          |          |          |          |

body weight (g)

|    | mean | SD  | SEM |
|----|------|-----|-----|
| WT | 4.8  | 4.6 | 4.2 |
| KO | 1.9  | 2.1 | 2   |

muscle weight (g)

|    | mean | SD   | SEM  |
|----|------|------|------|
| WT | 0.42 | 0.41 | 0.38 |
| KO | 0.18 | 0.21 | 0.17 |
